# Supplementary material for: Seasonal Variation in Aflatoxins Levels in Edible Seeds, Estimation of Its Dietary Intake and Vitamin E Levels From Southern Areas of Punjab, Pakistan
Source: Preprints.org preprint supplement (doi:10.20944/preprints202011.0486.v1), 2020-11-18
Supplement: Supplementary file 1 [file supplementary]

**Food Frequency Questionnaire**

| **Name** | **Age** | **Sex** |
| --- | --- | --- |
| **Weight (kg)** | **City** | **District** |
| **CNIN** |  |  |

Please put a tick on your concerned line

| **Product name** | **Never experienced** | **Seldom used** | **Per day consumption** | | | | **Per week consumption** | **Per month consumption** |
| --- | --- | --- | --- | --- | --- | --- | --- | --- |
| 150-200gl | 200- 350g | 350-500g | >500g |
| Melon Seeds |  |  |  |  |  |  |  |  |
| Watermelon Seeds |  |  |  |  |  |  |  |  |
| Pumpkin Seeds |  |  |  |  |  |  |  |  |
| Cantaloupe Seeds |  |  |  |  |  |  |  |  |
| Mix |  |  |  |  |  |  |  |  |

Consent: I give my full consent to use my information for research purpose

**Name**: ------------------------- **Signature**: ---------------------
